# Supplementary material for: Responses of Aspergillus flavus to Oxidative Stress Are Related to Fungal Development Regulator, Antioxidant Enzyme, and Secondary Metabolite Biosynthetic Gene Expression
Source: PubMed Central journal article supplement (PMC5175028; doi:10.3389/fmicb.2016.02048), 2016-12-21

Supplemental Figure S1

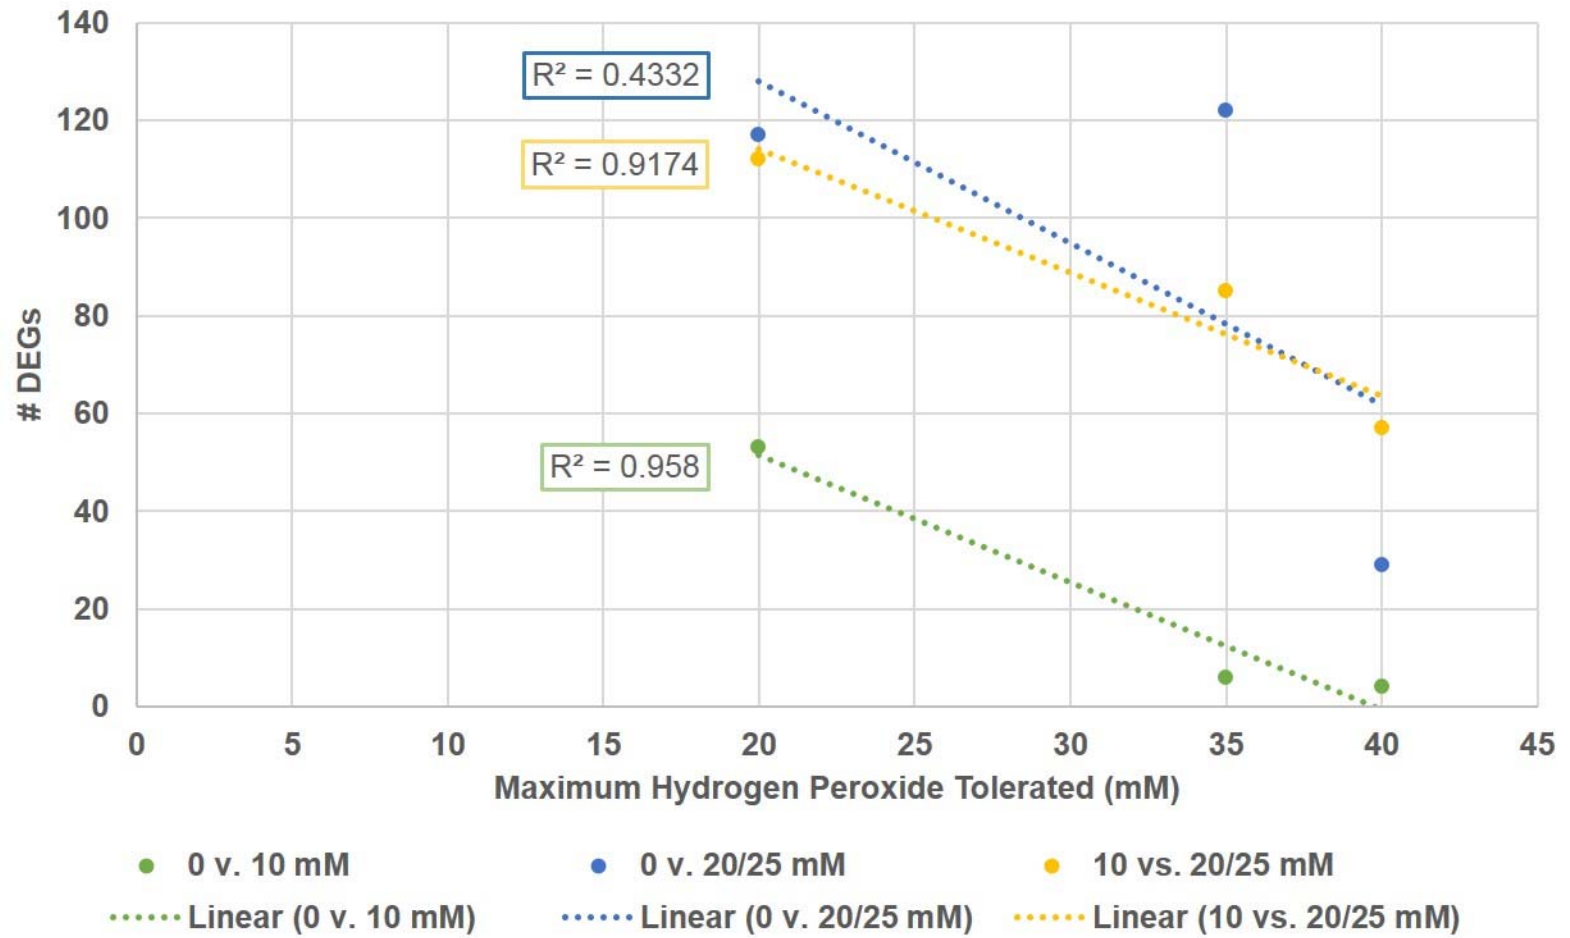

Supplemental Figure S2

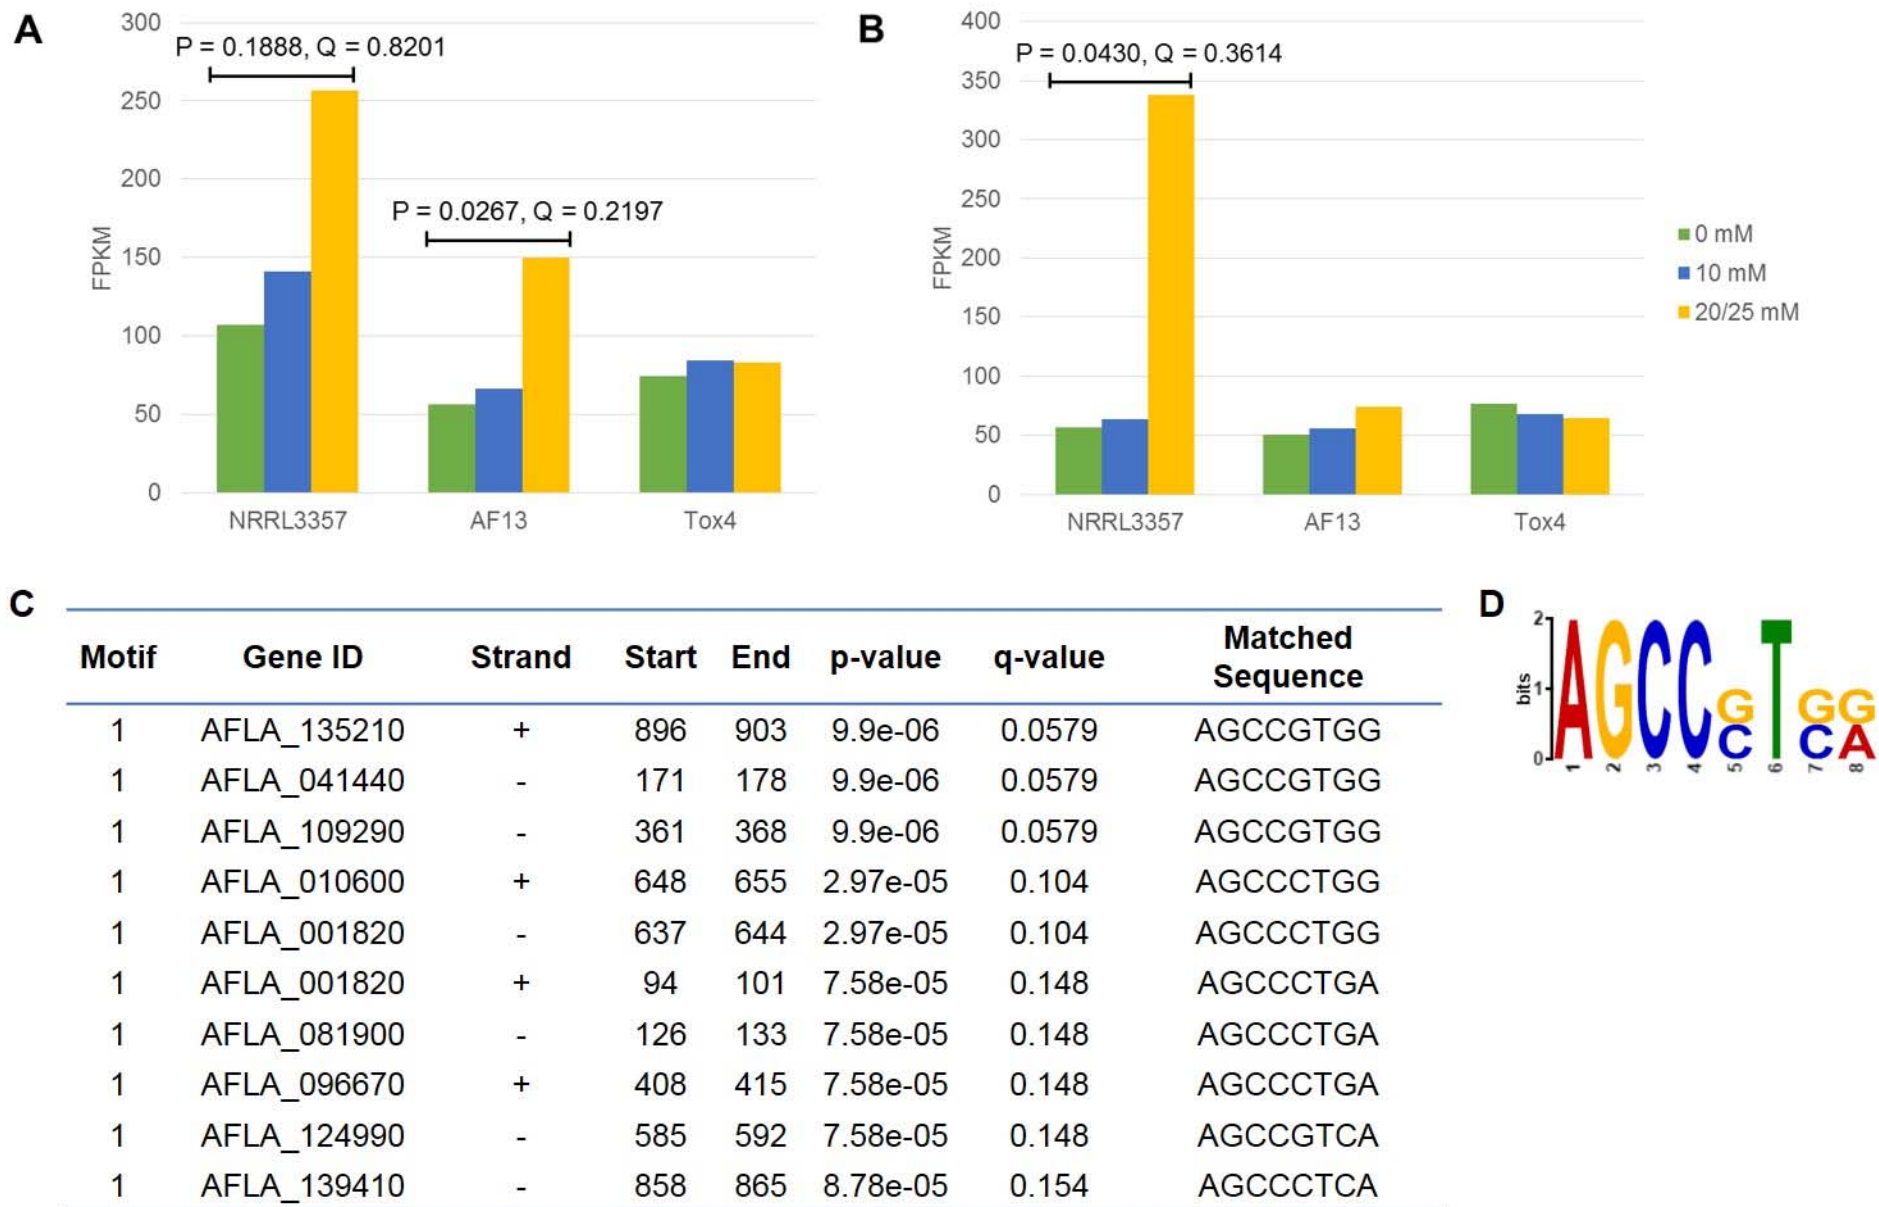

Supplement: SupplementaryFigures.pdf [file SupplementaryFigures.pdf]
